1           **Full Title: Caries status, caries severity, and oral health-related quality of life of**  
2                                               **preschool children in Kuantan**

3           **Short Title: Caries and oral health-related quality of life of preschool children**

4                                               Muhammad Zaki Ramli<sup>(a)</sup>

5                                               Nina Suhaity Azmi<sup>(b)</sup>

6                                               Ahmad Faisal Ismail<sup>(c)</sup>

7  
8           <sup>(a)</sup>Department of Fundamental and Dental Medical Sciences, Kulliyyah of Dentistry,  
9                                               International Islamic University, Kuantan, Pahang, Malaysia

10          <sup>(b)</sup>Faculty of Industrial Science and Technology, Universiti Malaysia Pahang, Gambang,  
11                                               Pahang, Malaysia

12          <sup>(c)</sup>Department of Pediatric Dentistry and Dental Public Health, Kulliyyah of Dentistry,  
13                                               International Islamic University, Kuantan, Pahang, Malaysia

14  
15                                               Corresponding Author:

16                                               Muhammad Zaki Ramli

17                                               [zakiramli@iium.edu.my](mailto:zakiramli@iium.edu.my)

18  
19          **Abstract**

20  
21          Dental caries among preschool children is prevalent and may affect their oral health-related  
22          quality of life (OHRQOL). The aim of this study was to assess the oral health-related quality  
23          of life (OHRQOL) of preschool children from Kuantan in relation to their dental caries status  
24          and severity. A cross-sectional survey using the Malay version of Early Childhood Oral Health

**NOTE: This preprint reports new research that has not been certified by peer review and should not be used to guide clinical practice.**

25 Impact Scale (Malay-ECOHIS) involving preschool children aged three until six years old was  
26 conducted employing a convenience sampling. The dmft score of the preschool children was  
27 evaluated by a professional pediatric dentist, and the body mass index (BMI) was recorded.  
28 The caries status data was classified into either Absent (dmft = 0) or Present (dmft  $\geq$  1), while  
29 caries severity data was categorized into No Caries (dmft = 0), Moderate (dmft = 1 or 2), and  
30 High (dmft  $\geq$  3), depending on the caries experience. The Pearson Chi-square and Spearman  
31 correlation analyses were conducted. A high caries prevalence was recorded (89.1%), affecting  
32 55 preschool children. They were more impacted than their family in terms of their OHRQOL,  
33 and those with high caries severity and those from low household income showed the lowest  
34 OHRQOL. However, since most of them were from high household income, their families were  
35 not financially impacted. It is important to not only assess the caries status of the preschool  
36 children when assessing their OHRQOL, but also their caries severity.

37

## 38 **Introduction**

39 Dental caries is the most prevalent disease in humans globally (1). It remains a  
40 significant public health problem and is considered pandemic worldwide. Untreated dental  
41 caries is one of the most prevalent noncommunicable diseases (2). A subset of dental caries,  
42 early childhood caries (ECC), is a considerable pediatric and public health problem worldwide  
43 (3–5). ECC is characterized by the presence of at least one decayed, missing, or filled tooth  
44 surfaces in any primary tooth, affecting children below 71 months old (6). A severe form of  
45 ECC, called severe early childhood caries (S-ECC) is an aggressive form of dental caries  
46 classified by the presence of a decayed, missing (due to caries), or filled tooth (dmft) index  
47 score of  $\geq$ 4 (age 3),  $\geq$ 5 (age 4), or  $\geq$ 6 (age 5) (7).

48

49 Dental caries may significantly impact the quality of life of the individuals affected by  
50 the highly prevalent oral disease (8). Due to a poor oral health and practice, children's quality  
51 of life can greatly be impacted (9). Distress could result following dental pain, dental abscess,  
52 gum disease and damaged teeth, diseases which may eventually lead to negative impacts on  
53 their social, functional, and psychological well-being (10). During these years of growth,  
54 children are actively attending schools, which are an effective platform for conducting oral  
55 health education programs (11).

56

57 However, since the end of 2019, the world was struck with the pandemic coronavirus  
58 (COVID-19) infection, thus the effects included the closure of schools, not allowing the school-  
59 aged children for schooling (12), including the preschool children. Not only the schools and  
60 preschools, but the dental services were also limited to be accessed during the period, thus  
61 opening more possibilities for the preschoolers to be affected by dental caries if they were not  
62 treated immediately. Also, not only the preschool children were affected; their whole family  
63 members could also be affected Hence, studies on this population's oral health-related quality  
64 of life (OHRQOL) in relation to their dental caries status and severity need to be conducted.  
65 This was the aim of the study specifically on the preschool children from preschools in  
66 Kuantan, Pahang, Malaysia.

67

## 68 **Methodology**

69

70 Ethical Approval and Informed Consent

71

72 Ethical approval was granted by the IIUM Research Ethics Committee (IREC) (ID no.:

73 IREC 2020-036). The data were collected from 1 September 2021 until 31 December 2021.  
74 Parents and children were informed that the participants could withdraw from the study at any  
75 time. A written consent was distributed to the parents before including their preschool children  
76 in the study.

77

## 78 Data Collection

79

80 A cross-sectional survey involving preschool children aged three to six years old was  
81 conducted. A convenience sampling method was employed as few schools allowed outsiders  
82 to conduct studies at their premises during the pandemic. A validated questionnaire named  
83 Malay-Early Childhood Oral Health Impact Scale (Malay-ECOHIS) was distributed to the  
84 parents via the preschools. The inclusion criteria were those parents who can read and write in  
85 Malay language, and they must be a citizen of Malaysia. Parents of preschool children  
86 functioned as a proxy to answer the questionnaires. The questionnaire also collected  
87 information about the age and gender of the children and the family's monthly household  
88 income.

89

90 The Malay-ECOHIS consisted of 13 items with two sections of the child impacts  
91 section and family impacts section. For answering this section, the parents were requested to  
92 recall the child's all-inclusive lifetime experience. The 6-point Likert Scale was used as the  
93 response scale, namely "never", "hardly ever", "occasionally", "often", "very often," and  
94 "don't know." Each of the scales was scored as 0 for "never", 1 for "hardly ever", 2 for  
95 "occasionally", 3 for "often", and 4 for "very often," while "don't know" responses were  
96 recorded as a missing value. Questionnaires with at least one "don't know" answer on the child  
97 impacts section or family impacts section were excluded from being analyzed. The total score

98 was calculated using a simple sum. The total score for the child impacts section was from 0 to  
99 36, and the total score for family impacts section was from 0 to 16. To determine the presence  
100 of impact, the answer records at least one answer of “occasionally” or “often” or “very often,”  
101 while “never” or “hardly ever” indicated the absence of impact for both parts.

102

### 103 Children’s Oral Examination

104

105 The dmft score of the preschool children was evaluated by a trained and calibrated  
106 pediatric dentist. Visual inspection was used for registration of dental caries, and the  
107 examinations were conducted in daylight using a plane mouth mirror.

108

### 109 Measuring the Preschool Children’s Weight and Height

110

111 The body weight and height were recorded so that their body mass index (BMI) could  
112 be calculated. The BMI Percentile Calculator for Child and Teen by the Centers for Disease  
113 Control and Prevention (CDC) was used as the subjects in this study were preschool children.  
114 The calculator can be accessed at the following link:  
115 <https://www.cdc.gov/healthyweight/bmi/calculator.html>. The data was then classified into the  
116 BMI categories namely underweight, health, overweight, and obese.

117

### 118 Data Analysis

119

120 Data processing, data analyses, and statistical evaluation were performed by means of  
121 the IBM SPSS Statistics 25. The prevalence proportion rates of dmft, BMI, and household

122 income were calculated. The caries status data was classified into either Absent (dmft = 0) or  
123 Present (dmft  $\geq$  1), while caries severity data was categorized into No Caries (dmft = 0),  
124 Moderate (dmft = 1 or 2), and High (dmft  $\geq$  3), depending on the number of caries experience.  
125 For household income, the categories were Low, Moderate, and High based on Pahang's 2019  
126 mean household income as reported by the Department of Statistics Malaysia.

127

128 For the statistical analyses, to compare between groups, the Mann-Whitney U test was  
129 performed. Next, to compare the proportional means, univariant statistical analysis was  
130 performed using the Kruskal-Wallis non-parametric test. To assess the association and  
131 correlation between caries status and caries severity among preschool children with their oral  
132 health-related quality of life, the Pearson Chi-square and Spearman correlation analyses were  
133 conducted. The level of significance was set to  $p < 0.05$ .

134

## 135 **Results**

136 Two preschools agreed to take part in the study and were visited to collect the data and  
137 samples from the preschool children. In total, 55 Malay preschool children participated in the  
138 study. Table 1 shows the sociodemographic characteristics of the preschool children from the  
139 two preschools, and Table 2 shows the summary of descriptive statistics of the preschool  
140 children. The majority of the preschool children had caries (89.1%) with majority of them had  
141 high severity (65.5%), were of healthy BMI (47.3%), and came from families with high  
142 household income (52.7%). Only household income showed a significant association with  
143 caries severity, while no significant association was found with caries status (Table 3).

144

145 Table 4 shows the Malay-ECOHIS responses of parents (n=55) about the oral  
146 conditions of their children. In the child impacts section, more than half of the children were  
147 reported to never have “had pain in the teeth, mouth or jaws” (56.4%). Next, the most  
148 frequently reported oral impact was “difficulty eating some food” with 14.5% of the children  
149 were reported to hardly ever experience the difficulty. Only 29.1% of the children were  
150 reported to experience the oral impact namely difficulty to eat some food, while the rest of the  
151 children (70.9%) were reported to never experience it. As for the other oral impacts to the  
152 children, most of the children were reported to never experience any of these, ranging from  
153 85.5% to 92.7% of the children. However, it is notable that six (10.9%) children were reported  
154 to occasionally avoid smiling or laughing when they were orally impacted.

155

156 Next, in terms of family impacts, feeling guilty by the parent or another family member  
157 because the children had dental problem or treatment was reported to score the lowest among  
158 the items. The other two items under the family impacts showed different distributions. The  
159 item “been upset” was mostly rated as “Never” by 45 (81.8%) of the parents. The final item in  
160 the family impacts, “taken time off from work” was rated by almost all parents, 54 (98.2%) as  
161 “Never”. Finally, the last item in the Malay-ECOHIS asked the parents about how often their  
162 children had dental problems or dental treatments that had a financial impact on their family.  
163 From the survey, majority of the parents (96.4%) rated that they never had such an issue. In  
164 this study, the Malay-ECOHIS scores ranged from 0 to 15 in the child impacts section (mean  
165 = 2.4, SD = 3.5), while for the family impacts section, the scores ranged from 0 to 8 (mean =  
166 1.2, SD = 2.0).

167

168           Next, the data collected from the parents was classified into either having no impact on  
169 the children and family or not. This was conducted by recording “never” or “hardly ever” as  
170 the absence of impact, while “occasionally,” “often,” and “very often” were grouped into the  
171 presence of impact. This section disregarded those with at least one “don’t know” answer on  
172 the child impacts section or family impacts section. Of the 55 respondents, 4 included “don’t  
173 know” in at least of the answers, thus they were excluded in the analysis, leaving 51  
174 respondents for further analyses.

175

176           As shown in Table 5, in both sections and domains, the “never and hardly ever”  
177 responses recorded much higher scores than their counterparts namely “occasionally, often,  
178 and very often”. However, it can be noted that the child symptom domain had the highest scores  
179 for the “occasionally, often, and very often” responses, followed by “had difficulty eating some  
180 food” item under the child function domain and “felt guilty” item under the parental distress  
181 domain, which is in the family impacts section. Moreover, in the family impacts section, no  
182 responses were recorded for “occasionally, often, and very often” specifically from the “taken  
183 time off from work” item under the family function domain, as well as the financial impact  
184 item.

185

186           Next, the association and correlation between caries status and children’s OHRQOL  
187 and family’s OHRQOL in the Malay-ECOHIS among the preschool children were assessed.  
188 As shown in Table 6, between the impacts on the children and the family, the score was higher  
189 on the children compared to the family. This was evident in the score for impacts on the  
190 children with caries (25.5%) than on the family members with caries-bearing children (11.8%).



191 However, both did not show any significant correlation ( $p>0.05$ ) as also evidenced by the  
192 Spearman correlation results.

193

194 As shown in Table 7, none of the domains and sections had a p-value of less than 0.05.  
195 Therefore, caries status did not have a significant impact on any of the sections and domains in  
196 the Malay-ECOHIS. Also notable are the means for the preschool children with caries scored  
197 higher than the means for the preschool children without caries in all sections and domains.  
198 Thus, the caries-bearing children were more impacted in terms of their OHRQOL compared to  
199 the caries-free children. The table also shows that high caries severity had the highest means  
200 in all sections and domains, as well as the Malay-ECOHIS score. Both child impacts and family  
201 impacts sections had statistically significant difference ( $p < .05$ ), but not in all domains.  
202 Overall, the Malay-ECOHIS showed the highest mean in the high caries severity group.

203

204 Finally, in Table 8, it shows that the family impacts section and both domains in the  
205 section had a statistically significant difference, with all of them had a statistically significant  
206 difference between high household income and low household income, while the family  
207 function domain also had a statistically significant difference between middle household  
208 income and low household income. As for the child impacts section, all except one domain did  
209 not have a significant difference. The child self-image and social interaction domain had a  
210 significant difference between two pairs, namely middle household income vs. low household  
211 income and high household income vs. low household income. In all sections and domains in  
212 the Malay-ECOHIS responses, the household income in the low category showed the highest  
213 means. The overall Malay-ECOHIS thus also scored the highest mean in the low household  
214 income.

215

## 216 **Discussion**

217           This present study was the first to assess the impacts of demographic profiles, caries  
218 status, caries severity, BMI categories, and household income on the OHRQOL of the  
219 population aged three to six years old in Kuantan by adopting the Malay version of ECOHIS.  
220 This allowed the findings to be compared with the previous studies that used the same scale  
221 either in Malay, English or other languages. Also, by adopting an instrument that has been  
222 validated in the same country, it allows differences in semantics and norms to be factored out  
223 (13).

224

225           All the subjects in this study were Malays. In terms of ethnicity, this present study was  
226 equivalent to a previous study that involved an all-Malay population in Kota Bharu, Kelantan  
227 (14). Other earlier studies also did not manage to involve many preschool children from other  
228 ethnicities in Malaysia. For example, of the 138 subjects in the study by (15), only 8.7% were  
229 non-Malays, while only 2.4% of the 127 preschool children were non-Malays in the study by  
230 (16). Therefore, it was common to include mostly Malay subjects, if not all, in the study that  
231 used the Malay-ECOHIS questionnaire. Furthermore, among the preschool children, dental  
232 caries was present in most of them (89.1%), and the mean dmft score was 4.47 (range 0–14).  
233 This finding was in fact higher than the previous national oral health report of preschool  
234 children in Pahang (17) and a recent study from the similar population in Kuantan, Pahang  
235 (18).

236

237           Moreover, in terms of age, this study managed to collect responses from the parents  
238 and guardians of preschool children aged three to six years old. Most of the preschool children  
239 were four years old (32.7%). The three years old preschool children (9.1%) were the lowest in  
240 number among the subjects as usually in Malaysia these young children are not sent to  
241 preschools but instead are taken care off by their parents or grandparents. Some parents also  
242 did not allow their young children of that age to be involved in the study, since the sampling  
243 period was conducted during the pandemic.

244

245           Next, this present study found that caries was more prevalent in male preschool children  
246 (52.7%) compared to their female counterparts (36.4%) (Table 4). This finding was same as  
247 the one reported by previous studies (14,19). However, like that reported by (14), no significant  
248 association was established between the caries experience and gender, while (19) reported a  
249 significant association. However, earlier studies have reported gender as a risk factor for caries  
250 in preschool children, with being male to be a sociodemographic factor that was more  
251 frequently implicated compared to the female counterpart (20). Gender did not exhibit a direct  
252 significant relationship towards dmft, but it showed an indirect significant relationship towards  
253 dmft through children sociological factor (21).

254

255           None of the variables included in the study showed significant associations with either  
256 caries status or caries severity, except the association between household income categories  
257 and caries severity ( $p = .05$ ). The high household income group with high caries severity scored  
258 the highest percentage (Table 3). However, the socioeconomic bias of this study should not be  
259 neglected. The preschool children were schooled at private schools that normally charge higher  
260 fees than the public preschools. Thus, it could be expected that the families were from high

261 socioeconomic groups, thus had high household income. This finding was in congruence with  
262 (22). They stated children whose parents belong to an upper socioeconomic class were at higher  
263 odds of suffering from S-ECC. On the other hand, another study reported that the prevalence  
264 of S-ECC significantly decreased in children from high-income families (23). However, there  
265 are other factors such as the preschool children's dietary intakes and accessibility to dental  
266 services that determine the association between caries severity and socioeconomic status of the  
267 preschool children's families. Thus, these need to be further investigated.

268

269 From the distribution of items in this present study, among the 51 responses (Table 5),  
270 it was found that all the items in the Malay-ECOHIS never or hardly ever impacted the  
271 preschool children at much higher percentages than them being occasionally, often, and very  
272 often impacted. However, the "pain in the teeth, mouth or jaws" and "had difficulty eating  
273 some food" items in the child impacts section and the "felt guilty" item in the family impacts  
274 section were the three most frequently impacted items. Since the prevalence of caries in  
275 population of the present study was high, it could be expected that they scored highest in the  
276 child symptom domain as individuals with caries are reported to be more likely to have dental  
277 pain (24).

278

279 Other than that, severe caries can cause dental pain that exerts a negative impact on the  
280 performance of activities of daily living including going to school (25). However, in terms of  
281 the item with the least impact particularly in the child impacts section, this study found that  
282 "missed school" scored the least negative impact on the preschool children (Table 5). This  
283 finding was consistent with A. N. Hashim et al. (2015), Dolah et al. (2019), Montoya et al.  
284 (2021), and Arrow et al. (2021) as they also scored the lowest impact in the item. This means

285 the least negative impact due to oral health issues among the children was their absenteeism  
286 from the learning institution. However, because the study was conducted during the pandemic,  
287 it could explain the reasons this item scored the least because the schools were closed for some  
288 months along the period.

289

290 Moreover, in the present study's family impacts section of the Malay-ECOHIS, the  
291 "felt guilty" item scored the highest score among the items (Table 5). This was also in  
292 agreement with the earlier Malaysian studies using the same instrument, namely A. N. Hashim  
293 et al. (2015) and Dolah et al. (2019). It was reported that the number of parents who felt guilty  
294 increased with the increase of their children's dental caries severity (27). Parents could feel  
295 guilty about the oral problems faced by their children as these may affect the quality of life of  
296 the children. The feeling of guilt was caused by the sense of responsibility among the parents  
297 for their children's oral health problems (14). Despite the efforts made by the dental team in  
298 promoting the ways to prevent oral diseases, the parents have failed to take necessary and  
299 effective means to help their children maintain good oral practices as not to be affected by the  
300 eventual oral problems.

301

302 Financial difficulty could lead to a high prevalence of decayed teeth as they remain  
303 untreated (28), thus leading to the consequent oral impacts and eventually affecting the quality  
304 of life of the impacted individuals. However, this was not the case for the present study as the  
305 financial impact item scored among the lowest. This was possibly because the preschool  
306 children were mostly from high socioeconomic status families, thus they could afford to send  
307 their kids to private preschools. People from this subpopulation are also expected to be  
308 financially capable of getting dental healthcare and services, thus they are not substantially

309 affected when it comes to their OHRQOL. Hence, this could also explain the reasons the  
310 parents and guardians involved in the study were not financially burdened.

311

312 When compared between the child impacts section and the family impacts section  
313 (Table 6), this present study found that the preschool children were more impacted than their  
314 family members, and neither had an association and a correlation with caries status of the  
315 children. This finding was inconsistent with the previous studies in a few ways. For example,  
316 Dolah et al. (2019) reported that the family members were more impacted than the children,  
317 and the association between the impacts on the family members and caries status was found to  
318 be significant ( $p < .05$ ). Next, although A. N. Hashim et al. (2015) and Randrianarivony et al.  
319 (2020) also reported that the children were more impacted than their family members, they  
320 found that both had significant associations with caries status. These variations in the results  
321 were possibly contributed by the different demographic settings of the present study and the  
322 previous ones, besides the socioeconomic bias this present study had and due to the sample  
323 size variations.

324

325 As stated above, there was no association and correlation between the child impacts  
326 section and caries status. When these were further investigated at domain levels, none of the  
327 domains showed a significant difference with the caries status. The same findings were also  
328 found in the family impacts section. However, when the caries status was further divided into  
329 its severity levels, some significant differences were found. These include the significant  
330 differences between moderate and high caries severity in both sections and the following  
331 domains: child symptom domain, child function domain, and parental distress domain. In fact,  
332 the overall Malay-ECOHIS showed a significant difference between the moderate and high

333 caries severity. Therefore, it is important to not only assess the caries status of the preschool  
334 children when assessing their OHRQOL, but also their caries severity as these two variables  
335 might give different results in certain sections and domains.

336

337           Moreover, in terms of the household income categories, the family impacts section and  
338 both of its domains recorded significant differences between low and high household income  
339 categories. Besides, a domain in the child impacts section, namely child self-image and social  
340 interaction domain also showed a significant difference between the same household income  
341 categories. More importantly, the low household income category showed the worst impacts  
342 in all sections and domains of the Malay-ECOHIS. These findings were expected because  
343 families from low socioeconomic backgrounds faced difficulties to keep their children's dental  
344 healthcare due to factors such as financial reasons and access to dental care (29,30).

345

346           The study initially targeted to get the number of samples similar to the study by (14),  
347 i.e., around 200 preschool children. The study was conducted in a similar area in the east coast  
348 of Peninsular Malaysia, i.e., Kota Bharu, Kelantan. However, the present study managed to  
349 collect 55 samples during the pandemic. However, in studies on psychometric analysis, their  
350 sample size requirement is dependent mainly on the number of items in the scale. According  
351 to quality criteria for measurement properties of health status questionnaires, at least 50  
352 subjects are necessary for an appropriate analysis of construct validity, reproducibility, and  
353 responsiveness (31). Hence, as the Malay-ECOHIS instrument used in this study contained 13  
354 items, the sample size of 55 was considered sufficient for the purpose of assessing its  
355 psychometric properties. The current study was conducted during the pandemic at which it was  
356 difficult to arrange for data and sample collection with the preschools due to the changes in the

357 rules set by the Malaysian government from time to time to control the coronavirus (COVID-  
358 19) infection. Also, some parents were reluctant to participate and allow their children to be  
359 involved in the study.

360

### 361 **Conclusion**

362 Most of the preschool children (89.1%) in this study had caries (n=55), and the oral  
363 disease had impacted their quality of life. However, the preschool children were more impacted  
364 than their family. Other than that, their family was also affected, especially in feeling guilty.  
365 Since most of them came from families with a high household income background, they were  
366 not financially impacted. Caries status did not significantly affect these schools' preschool  
367 children and their families during the pandemic in terms of their OHRQOL, but those with high  
368 caries severity and those from low household income significantly showed higher impacts.  
369 When assessing their OHRQOL, it is important to not only assess the caries status of the  
370 preschool children, but also their caries severity. Parents should take precautionary measures  
371 and actions as soon as possible to ensure their children are not affected by low OHRQOL at  
372 their later ages.

373

### 374 **Acknowledgements**

375 We would like to thank Glycobio for the supports and Universiti Malaysia Pahang for  
376 the grant (PGRS2003125).

377

### 378 **Author Contributions**

379 Conceptualization: Muhammad Zaki Ramli



380 Data curation: Muhammad Zaki Ramli

381 Formal analysis: Muhammad Zaki Ramli

382 Funding acquisition: Muhammad Zaki Ramli, Nina Suhaity Azmi

383 Investigation: Muhammad Zaki Ramli

384 Methodology: Muhammad Zaki Ramli, Ahmad Faisal Ismail

385 Project administration: Muhammad Zaki Ramli

386 Supervision: Nina Suhaity Azmi, Ahmad Faisal Ismail

387 Validation: Nina Suhaity Azmi, Ahmad Faisal Ismail

388 Writing – original draft: Muhammad Zaki Ramli

389 Writing – review & editing: Muhammad Zaki Ramli, Nina Suhaity Azmi, Ahmad Faisal Ismail

390

391 **References**

392

393 1. Prados-Privado M, Villalón JG, Martínez-Martínez CH, Ivorra C, Prados-Frutos JC.

394 Dental caries diagnosis and detection using neural networks: A systematic review. *J Clin*

395 *Med.* 2020;9(11):1–13.

396 2. Arantes R, Welch JR, Tavares FG, Ferreira AA, Jr CEAC, Vettore MV. Human

397 ecological and social determinants of dental caries among the Xavante Indigenous

398 people in Central Brazil. *PLoS One.* 2018;13(12):1–20.

- 399 3. Nagarajappa R, Satyarup D, Naik D, Dalai RP. Feeding practices and early childhood  
400 caries among preschool children of Bhubaneswar, India. *European Archives of*  
401 *Paediatric Dentistry*. 2020;21(1):67–74.
- 402 4. Folayan MO, Oginni AB, El Tantawi M, Alade M, Adeniyi AA, Finlayson TL.  
403 Association between nutritional status and early childhood caries risk profile in a  
404 suburban Nigeria community. *Int J Paediatr Dent*. 2020;30(6):798–804.
- 405 5. Li J, Fan W, Zhou Y, Wu L, Liu W, Huang S. The status and associated factors of early  
406 childhood caries among 3- to 5-year-old children in Guangdong, Southern China: A  
407 provincial cross-sectional survey. *BMC Oral Health*. 2020;20(1):1–8.
- 408 6. Anil S, Anand PS. Early childhood caries: Prevalence, risk factors, and prevention.  
409 *Frontiers in Pediatrics*. 2017;5(July):1–7.
- 410 7. Policy on Early Childhood Caries (ECC): Classifications, Consequences, and Preventive  
411 Strategies. *American Academy of Pediatric Dentistry*. 2016;(6):60–2.
- 412 8. Wang Y, Wang S, Wu C, Chen X, Duan Z, Xu Q, et al. Oral microbiome alterations  
413 associated with early childhood caries highlight the importance of carbohydrate  
414 metabolic activities. *American Society for Microbiology*. 2019;4(6):1–15.
- 415 9. Barasuol JC, Santos PS, Moccellini BS, Magno MB, Bolan M, Martins-Júnior PA, et al.  
416 Association between dental pain and oral health-related quality of life in children and  
417 adolescents: A systematic review and meta-analysis. *Community Dentistry and Oral*  
418 *Epidemiology*. 2020;48(4):257–63.
- 419 10. Aishah E, Nordin B, Shoaib LA, Yuzadi Z, Yusof M, Manan NM. Oral health-related  
420 quality of life among 11–12 year old indigenous children in Malaysia. *BMC Oral Health*.  
421 2019;19(152).

- 422 11. Bramantoro T, Santoso CMA, Hariyani N, Setyowati D, Zulfiana AA, Nor NAM, et al.  
423 Effectiveness of the school-based oral health promotion programmes from preschool to  
424 high school: A systematic review. *PLoS One*. 2021;16(8 August):1–16.
- 425 12. Zierer K. Effects of pandemic-related school closures on pupils’ performance and  
426 learning in selected countries: A rapid review. *Education Sciences*. 2021;11(6).
- 427 13. Alwattban RR, Alkhudhayr LS, Al-Haj Ali SN, Farah RI. Oral health-related  
428 quality-of-life according to dental caries severity, body mass index and  
429 sociodemographic indicators in children with special health care needs. *Journal of*  
430 *Clinical Medicine*. 2021;10(21):1–13.
- 431 14. Dolah S, Eusufzai SZ, Alam MK, Wan Ahmad WMA. Factors influencing oral health-  
432 related quality of life among preschool children in district of Kota Bharu, Malaysia: A  
433 cross-sectional study. *Pesqui Bras Odontopediatria Clin Integr*. 2019;20:1–10.
- 434 15. Hashim NA, Mohd Yusof ZY, Saud R. Responsiveness to change of the Malay-ECOHIS  
435 following treatment of early childhood caries under general anaesthesia. *Community*  
436 *Dent Oral Epidemiol*. 2018;1–8.
- 437 16. Hashim AN, Yusof ZYM, Esa R. The Malay version of the Early Childhood Oral Health  
438 Impact Scale (Malay-ECOHIS) - assessing validity and reliability. *Health Qual Life*  
439 *Outcomes*. 2015;13(1):1–10.
- 440 17. National Oral Health Survey of Preschool Children 2015 (NOHPS 2015). 2015.
- 441 18. Ismail AF, Adon AA, Nur A, Husain F, Sukmasari S, Ardini YD. Association between  
442 caries experience and body mass index (BMI) among preschool children in Kuantan.  
443 *Eurasian J Biosci*. 2020;14:4363–6.

- 444 19. Duangthip D, Chen KJ, Gao SS, Lo ECM, Chu CH. Early childhood caries among 3- to  
445 5-year-old children in Hong Kong. *International Dental Journal*. 2019;69(3):230–6.
- 446 20. Kirthiga M, Murugan M, Saikia A, Kirubakaran R. Risk factors for early childhood  
447 caries: A systematic review and meta-analysis of case control and cohort studies.  
448 *Pediatric dentistry*. 2019;41(2):95–112.
- 449 21. Ismail NS, Abdul Ghani NM, Supaat S, Kharuddin AF, Ardini YD. The early childhood  
450 oral health impact scale (ECOHIS): Assessment tool in oral health related quality of life.  
451 *Journal of International Dental and Medical Research*. 2018;11(1):162–8.
- 452 22. Mansoori S, Mehta A, Ansari MI. Factors associated with oral health-related quality of  
453 life of children with severe early childhood caries. *Journal of Oral Biology and*  
454 *Craniofacial Research*. 2019;9(3):222–5.
- 455 23. Li Y, Wulaerhan J, Liu Y, Abudureyimu A, Zhao J. Prevalence of severe early childhood  
456 caries and associated socioeconomic and behavioral factors in Xinjiang, China: A cross-  
457 sectional study. *BMC Oral Health*. 2017;17(1):1–10.
- 458 24. Montoya ALB, Knorst JK, Uribe IMP, González RAB, Ardenghi TM, Sánchez CCA.  
459 Cross-cultural adaptation and psychometric properties of the Mexican version of the  
460 Early Childhood Oral Health Impact Scale (ECOHIS). *Health and Quality of Life*  
461 *Outcomes*. 2021;19(1):1–8.
- 462 25. Utami SP, Liza F, Lisfrizal H. The development of the impact of early childhood caries  
463 on the quality of life of children aged 3-5 years at Paedodonti RSGM Baiturrahmah.  
464 *Denta*. 2021;15(2):92–9.

- 465 26. Arrow P, Brennan D, Mackean T, McPhee R, Kularatna S, Jamieson L. Evaluation of  
466 the ECOHIS and the CARIES-QC among an Australian “Aboriginal” population.  
467 *Quality of Life Research*. 2021;30(2):531–42.
- 468 27. Carvalho TS, Abanto J, Pinheiro ECM, Lussi A, Bönecker M. Early childhood caries  
469 and psychological perceptions on child’s oral health increase the feeling of guilt in  
470 parents: an epidemiological survey. *International Journal of Paediatric Dentistry*.  
471 2018;28(1):23–32.
- 472 28. Randrianarivony J, Ravelomanantsoa JJ, Razanamihaja N. Evaluation of the reliability  
473 and validity of the Early Childhood Oral Health Impact Scale (ECOHIS) questionnaire  
474 translated into Malagasy. *Health and Quality of Life Outcomes*. 2020;18(1):1–11.
- 475 29. Rezaei S, Pulok MH, Moghadam TZ, Zandian H. Socioeconomic-related inequalities in  
476 dental care utilization in northwestern Iran. *Clinical, Cosmetic and Investigational  
477 Dentistry*. 2020;12:181–9.
- 478 30. Mizuta A, Aida J, Nakamura M, Ojima T. Does the association between guardians’ sense  
479 of coherence and their children’s untreated caries differ according to socioeconomic  
480 status? *International Journal of Environmental Research and Public Health*.  
481 2020;17(5):1–11.
- 482 31. Terwee CB, Bot SDM, de Boer MR, van der Windt DAWM, Knol DL, Dekker J, et al.  
483 Quality criteria were proposed for measurement properties of health status  
484 questionnaires. *Journal of Clinical Epidemiology*. 2007;60(1):34–42.
- 485
- 486



*Table 1 Sociodemographic characteristics of the preschool children from the two preschools*

| Sociodemographic characteristics | Frequency |      |
|----------------------------------|-----------|------|
|                                  | n         | %    |
| <b>Age (years)</b>               |           |      |
| 3                                | 5         | 9.1  |
| 4                                | 18        | 32.7 |
| 5                                | 15        | 27.3 |
| 6                                | 17        | 30.9 |
| <b>Gender</b>                    |           |      |
| Boys                             | 32        | 58.2 |
| Girls                            | 23        | 41.8 |
| <b>Household income category</b> |           |      |
| High                             | 29        | 52.7 |
| Middle                           | 20        | 36.4 |
| Low                              | 6         | 10.9 |
| <b>BMI (type)</b>                |           |      |
| Underweight                      | 11        | 20.0 |
| Healthy                          | 26        | 47.3 |
| Overweight                       | 8         | 14.5 |
| Obese                            | 10        | 18.2 |
| <b>Dental caries status</b>      |           |      |
| Present (dmft $\geq$ 1)          | 49        | 89.1 |
| Absent (dmft = 0)                | 6         | 10.9 |
| <b>Dental caries severity</b>    |           |      |
| Caries free (dmft = 0)           | 6         | 10.9 |
| Moderate (dmft = 1 or 2)         | 13        | 23.6 |
| High (dmft $\geq$ 3)             | 36        | 65.5 |

medRxiv preprint doi: <https://doi.org/10.1101/2024.07.04.24309936>; this version posted July 5, 2024. The copyright holder for this preprint (which was not certified by peer review) is the author/funder, who has granted medRxiv a license to display the preprint in perpetuity. It is made available under a [CC-BY 4.0 International license](https://creativecommons.org/licenses/by/4.0/).

*Table 2 Descriptive statistics*

| <b>N=55</b>           | <b>Mean</b> | <b>Range</b> |
|-----------------------|-------------|--------------|
| Age                   | 4.8         | 3–6          |
| Weight (kg)           | 18.2        | 12.9–34.9    |
| Height (cm)           | 102.26      | 91–121       |
| BMI                   | 16.5        | 13.43–17.54  |
| dmft                  | 4.47        | 0–14         |
| Household income (RM) | 7,751.11    | 1,000–30,000 |

medRxiv preprint doi: <https://doi.org/10.1101/2024.07.04.24309980>; this version posted July 5, 2024. The copyright holder for this preprint (which was not certified by peer review) is the author/funder, who has granted medRxiv a license to display the preprint in perpetuity. It is made available under a [CC-BY 4.0 International license](https://creativecommons.org/licenses/by/4.0/).

*Table 3 Association between caries status, severity, and household income categories*

|                        | <b>Household Income Categories</b> |                         |                       | <b>p-value*</b>          |
|------------------------|------------------------------------|-------------------------|-----------------------|--------------------------|
|                        | <b>Low<br/>N (%)</b>               | <b>Middle<br/>N (%)</b> | <b>High<br/>N (%)</b> |                          |
| <b>Caries status</b>   |                                    |                         |                       |                          |
| Absent                 | 0 (0.0%)                           | 4 (7.3%)                | 2 (3.6%)              | .23 <sup>(a)</sup>       |
| Present                | 6 (10.9%)                          | 16 (29.1%)              | 27 (49.1%)            |                          |
| <b>Caries severity</b> |                                    |                         |                       |                          |
| Absent                 | 0 (0.0%)                           | 4 (7.3%)                | 2 (3.6%)              | <b>.05<sup>(b)</sup></b> |
| Moderate               | 0 (0.0%)                           | 2 (3.6%)                | 11 (20.0%)            |                          |
| High                   | 6 (10.9%)                          | 14 (25.5%)              | 16 (29.1%)            |                          |

\* Chi-square test; (a)  $\chi^2 (2, N = 55) = 2.916$ ; (b)  $\chi^2 (4, N = 55) = 9.722$



Table 4 Malay-ECOHIS responses of parents (n=55)

| Impacts                                                                         | Never |      | Hardly ever |      | Occasionally |      | Often |     | Very often |     | Don't know |     | Mean (SD)   |
|---------------------------------------------------------------------------------|-------|------|-------------|------|--------------|------|-------|-----|------------|-----|------------|-----|-------------|
|                                                                                 | n     | %    | n           | %    | n            | %    | n     | %   | n          | %   | n          | %   |             |
| <b>Child Impacts Section</b>                                                    |       |      |             |      |              |      |       |     |            |     |            |     |             |
| Child Symptom Domain                                                            |       |      |             |      |              |      |       |     |            |     |            |     |             |
| How often has your child had pain in the teeth, mouth or jaws                   | 31    | 56.4 | 15          | 27.3 | 8            | 14.5 | 0     | 0.0 | 1          | 1.8 | 0          | 0.0 | 0.64 (0.87) |
| Child Function Domain                                                           |       |      |             |      |              |      |       |     |            |     |            |     |             |
| How often has your child ..... because of dental problems or dental treatments? |       |      |             |      |              |      |       |     |            |     |            |     |             |
| had difficulty drinking hot or cold beverages                                   | 50    | 90.9 | 3           | 5.5  | 2            | 3.6  | 0     | 0.0 | 0          | 0.0 | 0          | 0.0 | 0.13 (0.43) |
| had difficulty eating some food                                                 | 39    | 70.9 | 8           | 14.5 | 7            | 12.7 | 1     | 1.8 | 0          | 0.0 | 0          | 0.0 | 0.45 (0.79) |
| had difficulty pronouncing any words                                            | 48    | 87.3 | 1           | 1.8  | 3            | 5.5  | 1     | 1.8 | 0          | 0.0 | 2          | 3.6 | 0.36 (1.09) |
| missed preschool, day care or school                                            | 51    | 92.7 | 3           | 5.5  | 1            | 1.8  | 0     | 0.0 | 0          | 0.0 | 0          | 0.0 | 0.09 (0.35) |

|                                                                                                               |    |      |    |      |   |      |   |     |   |     |   |     |             |
|---------------------------------------------------------------------------------------------------------------|----|------|----|------|---|------|---|-----|---|-----|---|-----|-------------|
| <b>Child Psychology Domain</b>                                                                                |    |      |    |      |   |      |   |     |   |     |   |     |             |
| had trouble sleeping                                                                                          | 49 | 89.1 | 4  | 7.3  | 2 | 3.6  | 0 | 0.0 | 0 | 0.0 | 0 | 0.0 | 0.15 (0.45) |
| been irritable or frustrated                                                                                  | 49 | 89.1 | 3  | 5.5  | 3 | 5.5  | 0 | 0.0 | 0 | 0.0 | 0 | 0.0 | 0.16 (0.50) |
| <b>Child Self-Image and Social Interaction Domain</b>                                                         |    |      |    |      |   |      |   |     |   |     |   |     |             |
| avoided smiling or laughing                                                                                   | 47 | 85.5 | 2  | 3.6  | 6 | 10.9 | 0 | 0.0 | 0 | 0.0 | 0 | 0.0 | 0.25 (0.64) |
| avoided talking                                                                                               | 49 | 89.1 | 2  | 3.6  | 5 | 9.1  | 0 | 0.0 | 0 | 0.0 | 1 | 1.8 | 0.18 (0.55) |
| <b>Family Impacts Section</b>                                                                                 |    |      |    |      |   |      |   |     |   |     |   |     |             |
| <b>Parental Distress Domain</b>                                                                               |    |      |    |      |   |      |   |     |   |     |   |     |             |
| How often have you or another family member<br>..... because of your child's dental<br>problems or treatment? |    |      |    |      |   |      |   |     |   |     |   |     |             |
| been upset                                                                                                    | 45 | 81.8 | 2  | 3.6  | 4 | 7.3  | 0 | 0.0 | 0 | 0.0 | 0 | 0.0 | 0.27 (0.68) |
| felt guilty                                                                                                   | 36 | 65.5 | 10 | 18.2 | 3 | 5.5  | 4 | 7.3 | 0 | 0.0 | 2 | 3.6 | 0.69 (1.23) |
| <b>Family Function Domain</b>                                                                                 |    |      |    |      |   |      |   |     |   |     |   |     |             |
| taken time off from work                                                                                      | 54 | 98.2 | 1  | 1.8  | 0 | 0.0  | 0 | 0.0 | 0 | 0.0 | 0 | 0.0 | 0.02 (0.13) |

|                                                                                                               |    |      |   |     |   |     |   |     |   |     |   |     |             |
|---------------------------------------------------------------------------------------------------------------|----|------|---|-----|---|-----|---|-----|---|-----|---|-----|-------------|
| How often has your child had dental problems or dental treatments that had a financial impact on your family? | 53 | 96.4 | 0 | 0.0 | 0 | 0.0 | 0 | 0.0 | 0 | 0.0 | 2 | 3.6 | 0.18 (0.94) |
|---------------------------------------------------------------------------------------------------------------|----|------|---|-----|---|-----|---|-----|---|-----|---|-----|-------------|

*Table 5 Malay-ECOHIS responses of parents (n=51)*

| <b>Impacts</b>                                                                  | <b>Never or hardly ever</b> |          | <b>Occasionally, often, or very often</b> |          |
|---------------------------------------------------------------------------------|-----------------------------|----------|-------------------------------------------|----------|
|                                                                                 | <b>n</b>                    | <b>%</b> | <b>n</b>                                  | <b>%</b> |
| <b>Child Impacts Section</b>                                                    |                             |          |                                           |          |
| Child Symptom Domain                                                            |                             |          |                                           |          |
| How often has your child had pain in the teeth, mouth or jaws                   | 43                          | 84.3     | 8                                         | 15.7     |
| Child Function Domain                                                           |                             |          |                                           |          |
| How often has your child ..... because of dental problems or dental treatments? |                             |          |                                           |          |
| had difficulty drinking hot or cold beverages                                   | 49                          | 96.1     | 2                                         | 3.9      |
| had difficulty eating some food                                                 | 44                          | 86.3     | 7                                         | 13.7     |
| had difficulty pronouncing any words                                            | 48                          | 94.1     | 3                                         | 5.9      |
| missed preschool, day care or school                                            | 50                          | 98.0     | 1                                         | 2.0      |
| Child Psychology Domain                                                         |                             |          |                                           |          |

|                                                                                                                  |    |       |   |      |
|------------------------------------------------------------------------------------------------------------------|----|-------|---|------|
| had trouble sleeping                                                                                             | 49 | 96.1  | 2 | 3.9  |
| been irritable or frustrated                                                                                     | 49 | 96.1  | 2 | 3.9  |
| <b>Child Self-Image and Social Interaction Domain</b>                                                            |    |       |   |      |
| avoided smiling or laughing                                                                                      | 46 | 90.2  | 5 | 9.8  |
| avoided talking                                                                                                  | 49 | 96.1  | 2 | 3.9  |
| <b>Family Impacts Section</b>                                                                                    |    |       |   |      |
| <b>Parental Distress Domain</b>                                                                                  |    |       |   |      |
| How often have you or another family member .....<br>because of your child's dental problems or treatment?       |    |       |   |      |
| been upset                                                                                                       | 49 | 96.1  | 2 | 3.9  |
| felt guilty                                                                                                      | 45 | 88.2  | 6 | 11.8 |
| <b>Family Function Domain</b>                                                                                    |    |       |   |      |
| taken time off from work                                                                                         | 51 | 100.0 | 0 | 0.0  |
| How often has your child had dental problems or dental treatments that<br>had a financial impact on your family? | 51 | 100.0 | 0 | 0.0  |

*Table 6 Association and correlation between caries status and child's OHRQOL and family's OHRQOL in the Malay-ECOHIS*

| Caries status (dmft)  | Impact on child's OHRQOL                               |                  |                        | Impact on family's OHRQOL                              |                  |                        |
|-----------------------|--------------------------------------------------------|------------------|------------------------|--------------------------------------------------------|------------------|------------------------|
|                       | Absent<br>N (%)                                        | Present<br>N (%) | p-value <sup>(a)</sup> | Absent<br>N (%)                                        | Present<br>N (%) | p-value <sup>(b)</sup> |
| No. caries (dmft = 0) | 6 (11.8%)                                              | 0 (0.0%)         | .13                    | 6 (11.8%)                                              | 0 (0.0%)         | .34                    |
| Caries (dmft ≥ 1)     | 32<br>(62.7%)                                          | 13<br>(25.5%)    |                        | 39<br>(76.5%)                                          | 6 (11.8%)        |                        |
|                       | Spearman Correlation $r_s$ , (p-value) =<br>.21, (.13) |                  |                        | Spearman Correlation $r_s$ , (p-value) =<br>.13, (.35) |                  |                        |

(a) Chi-square test,  $X^2$  (1, N = 51) = 2.33; (b) Chi-square test,  $X^2$  (1, N = 51) = .91

medRxiv preprint doi: <https://doi.org/10.1101/2024.07.04.24309680>; this version posted July 5, 2024. The copyright holder for this preprint (which was not certified by peer review) is the author/funder, who has granted medRxiv a license to display the preprint in perpetuity. It is made available under a [CC-BY 4.0 International license](https://creativecommons.org/licenses/by/4.0/).

*Table 7 Descriptive statistics of the Malay-ECOHIS responses, ranges, and comparisons according to their caries status and caries severity (n=51)*

| Variables                    | Items (N) | Possible Range | Mean (SD)    | Caries Status |              | p-value* | Caries Severity        |                       |                   | p-value*   | Pairwise p-value        |
|------------------------------|-----------|----------------|--------------|---------------|--------------|----------|------------------------|-----------------------|-------------------|------------|-------------------------|
|                              |           |                |              | Absent        | Present      |          | No caries <sup>1</sup> | Moderate <sup>2</sup> | High <sup>3</sup> |            |                         |
| <b>Child Impacts Section</b> | 9         | 0–36           | 11.06 (3.32) | 9.83 (1.60)   | 11.22 (3.46) | .40      | 9.83 (1.60)            | 9.15 (0.38)           | 12.06 (3.80)      | <b>.03</b> | <b>.00</b><br>(2 vs. 3) |
| Child symptom domain         | 1         | 0–4            | 1.63 (0.87)  | 1.33 (0.52)   | 1.67 (0.90)  | .52      | 1.33 (0.52)            | 1.15 (0.38)           | 1.88 (0.98)       | <b>.02</b> | <b>.02</b><br>(2 vs. 3) |
| Child function domain        | 4         | 0–16           | 4.80 (1.61)  | 4.33 (0.82)   | 4.87 (1.69)  | .58      | 4.33 (0.82)            | 4.00 (0.00)           | 5.22 (1.90)       | <b>.01</b> | <b>.01</b><br>(2 vs. 3) |
| Child psychology domain      | 2         | 0–8            | 2.27 (0.70)  | 2.17 (0.41)   | 2.29 (0.73)  | 1.00     | 2.17 (0.41)            | 2.00 (0.00)           | 2.41 (0.84)       | .19        | -                       |

|                                                |    |      |                 |                 |                 |     |                 |                 |                 |            |                                |
|------------------------------------------------|----|------|-----------------|-----------------|-----------------|-----|-----------------|-----------------|-----------------|------------|--------------------------------|
| Child self-image and social interaction domain | 2  | 0–8  | 2.35<br>(0.98)  | 2.00<br>(0.00)  | 2.40<br>(1.03)  | .56 | 2.00<br>(0.00)  | 2.00 (0.00)     | 2.56<br>(1.19)  | .10        | -                              |
| <b>Family impacts section</b>                  | 4  | 0–16 | 4.75<br>(1.37)  | 4.12<br>(0.41)  | 4.82<br>(1.43)  | .43 | 4.17<br>(0.41)  | 4.00 (0.00)     | 5.16<br>(1.59)  | <b>.01</b> | <b>.01</b><br><b>(2 vs. 3)</b> |
| Parental distress domain                       | 2  | 0–8  | 2.73<br>(1.34)  | 2.17<br>(0.41)  | 2.80<br>(1.41)  | .43 | 2.17<br>(0.41)  | 2.00 (0.00)     | 3.12<br>(1.56)  | <b>.01</b> | <b>.01</b><br><b>(2 vs. 3)</b> |
| Family function domain                         | 2  | 0–8  | 2.02<br>(0.14)  | 2.00<br>(0.00)  | 2.02<br>(0.15)  | .94 | 2.00<br>(0.00)  | 2.00 (0.00)     | 2.03<br>(0.18)  | .74        | -                              |
| Malay-<br>ECOHis<br>items                      | 13 | 0–52 | 15.80<br>(4.49) | 14.00<br>(2.00) | 16.04<br>(4.69) | .35 | 14.00<br>(2.00) | 13.15<br>(0.38) | 17.22<br>(5.12) | <b>.00</b> | <b>.02</b><br><b>(2 vs. 3)</b> |

\* Chi-square test



Table 8 Descriptive statistics of the Malay-ECOHIS responses, ranges, and comparisons according to their household income (n=51)

| Variables                                      | Items (N) | Possible Range | Mean (SD)    | Household Income |                     |                   | p-value*   | Pairwise p-value                             |
|------------------------------------------------|-----------|----------------|--------------|------------------|---------------------|-------------------|------------|----------------------------------------------|
|                                                |           |                |              | Low <sup>1</sup> | Middle <sup>2</sup> | High <sup>3</sup> |            |                                              |
| <b>Child impacts section</b>                   | 9         | 0–36           | 11.06 (3.32) | 14.33 (5.43)     | 10.65 (2.66)        | 10.60 (2.86)      | .08        | -                                            |
| Child symptom domain                           | 1         | 0–4            | 1.63 (0.87)  | 2.33 (0.82)      | 1.55 (0.76)         | 1.52 (0.92)       | .05        | -                                            |
| Child function domain                          | 4         | 0–16           | 4.80 (1.61)  | 5.50 (2.74)      | 4.75 (1.33)         | 4.68 (1.52)       | .53        | -                                            |
| Child psychology domain                        | 2         | 0–8            | 2.27 (0.70)  | 2.83 (1.33)      | 2.25 (0.64)         | 2.16 (0.47)       | .33        | -                                            |
| Child self-image and social interaction domain | 2         | 0–8            | 2.35 (0.98)  | 3.67 (1.97)      | 2.10 (0.45)         | 2.24 (0.72)       | <b>.01</b> | <b>.01 (2 vs. 1)</b><br><b>.03 (3 vs. 1)</b> |
| <b>Family impacts section</b>                  | 4         | 0–16           | 4.75 (1.37)  | 6.83 (2.48)      | 4.50 (0.83)         | 4.44 (0.92)       | <b>.02</b> | <b>.02 (3 vs. 1)</b>                         |
| Parental distress domain                       | 2         | 0–8            | 2.73 (1.34)  | 4.67 (2.50)      | 2.50 (0.83)         | 2.44 (0.92)       | <b>.03</b> | <b>.03 (3 vs. 1)</b>                         |

|                        |    |      |              |              |              |              |     |                                |
|------------------------|----|------|--------------|--------------|--------------|--------------|-----|--------------------------------|
| Family function domain | 2  | 0-8  | 2.02 (0.14)  | 2.17 (0.41)  | 2.00 (0.00)  | 2.00 (0.00)  | .02 | .03 (2 vs. 1)<br>.03 (3 vs. 1) |
| Malay-ECOHIS items     | 13 | 0-52 | 15.80 (4.49) | 21.17 (7.63) | 15.15 (3.23) | 15.04 (3.68) | .06 | -                              |

\* Chi-square test

medRxiv preprint doi: <https://doi.org/10.1101/2024.07.04.24309980>; this version posted July 5, 2024. The copyright holder for this preprint (which was not certified by peer review) is the author/funder, who has granted medRxiv a license to display the preprint in perpetuity. It is made available under a [CC-BY 4.0 International license](#).
